# Supplementary material for: Heterologous Overexpression of ZmHDZIV13 Enhanced Drought and Salt Tolerance in Arabidopsis and Tobacco
Source: MDPI journal article supplement (doi:10.3390/agronomy12102378), 2022-10-01
Supplement: s1 [file s1]

### Supplementary Materials:

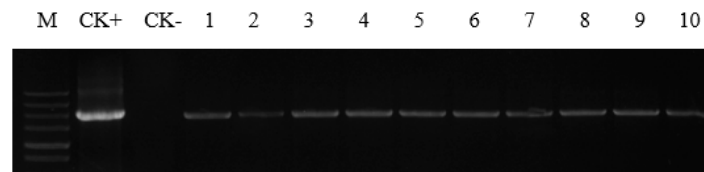

Figure S1 RT-PCR of the *35S::ZmHDZIV13* transgenic and WT *Arabidopsis* lines. M, DNA Marker D5000. CK+, Positive control. CK-, Negative control. 1~10, Resistant plants.

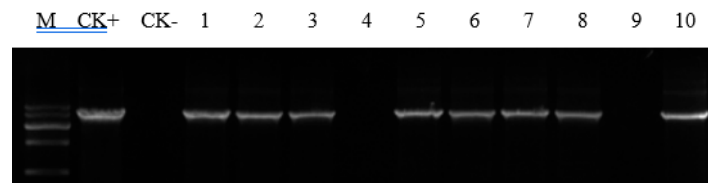

Figure S2 RT-PCR of the *35S::ZmHDZIV13* transgenic and WT tobacco. M, DNA marker VII. CK+, Positive control. CK-, Negative control. 1~10, *ZmHDZIV13* resistant plants.
